# Supplementary material
Source: Research Square preprint supplement (doi:10.21203/rs.3.rs-9560554/v1)
Supplement: Supplementary file 1 [file 8bd372250b2e516df833fb53.docx]

**Optimizing redox capability and basic site distribution in Co-modified Cu/ZSM-5 catalysts for efficient methanol oxidation**

Sihan Yina, Zhitao Hana*, Jiyue Wanga, Junhao Jinga, Liangzheng Lina, Yang Chea, Yangbo Denga

a. Marine Engineering College, Dalian Maritime University, Dalian 116026, China;

Correspondence information: Dr. Zhitao Han, Dalian Maritime University, No.1, Linghai Road, Dalian 116026, China, [hanzt@dlmu.edu.cn](mailto:hanzt@dlmu.edu.cn), ORCID: 0000-0001-5501-6067, Tel: +86 138 9869 2035.

**Materials**

CH3OH, CO2 (99.999 %) and N2 (99.999 %) pure gases were obtained from Dalian Special Gases Co., Ltd. Cu (NO3)2‧3H2O, Co (NO3)3∙6H2O were obtained from China National Pharmaceutical Group Co., Ltd. ZSM-5zeolite was obtained from Qingdao Yuan Ke Catalyst Co., Ltd.

**Catalyst Characterization**

The X-ray diffraction (XRD) tests were conducted using an X-ray diffractometer (Empyrean, PANalytical) with Cu Ka (λ = 0.154 nm) as the radiation source. The XRD diffractograms of the catalyst samples were recorded in the 2θ range of 5-90 ° with a scanning speed of 2 °/min and a scanning interval of 0.02 °.

The structural properties of the samples were investigated by N2 physisorption (ASAP 2020 PLUS, Micromeritics). The samples were required to be degassed under vacuum at 350 °C for 4 h before each test, N2 adsorption-desorption data were recorded at the temperature of liquid nitrogen (-196 °C). Specific surface areas and pore volumes were calculated using the Brunauer-Emmett-Teller (BET) equation and the Barrett-Joyner-Halenda (BJH) method, respectively.

Transmission electron microscopy (TEM) images of catalysts were measured on a JEM-2100F electron microscope (JEOL，Japan). The acceleration voltage was 200 kV, and the surface chemical analysis was conducted by using energy dispersive X-ray spectrometer (EDS).

The X-ray photoelectron spectra (XPS) of the catalysts were measured with a photoelectron spectrometer (AXIS-ULTRA DLD-600W, Shimadzu) using Al Kα as the radiation source. The binding energies of the different elements were calibrated by the C 1s peak at 284.6 eV.

The H2-temperature programmed reduction (H2-TPR) experiments were performed on the samples using a chemisorption analyzer (Autochem II 2920, Micromeritics). Firstly, the samples were dried and pretreated in a He flow (50 mL/min) at 350 °C for 1 h, and then cooled to 50 °C. Subsequently, the samples were heated up to 900 °C with an H2 (10 %)/Ar (50 mL/min) mixture as the reducing gas at a heating rate of 10 °C /min, while signal changes were recorded with a thermal conductivity detector (TCD).

The O2-temperature-programmed desorption (O2-TPD) experiments were performed on the samples using a chemisorption analyzer (Autochem II 2920, Micromeritics). Firstly, the samples were dried and pretreated in a He flow (50 mL/min) at 350 °C for 1 h, then cooled to 50 °C. Subsequently, the samples were exposed to O2 (5 %)/He (50 mL/min) mixture for 1 h to saturate the adsorption and then switched to He gas flow (50 mL/min) for 1 h to remove O2 physically adsorbed on the surface. Finally, the sample was heated up to 900 °C under He (50 mL/min) gas flow at a heating rate of 10 °C/min, while signal changes were recorded with TCD.

Temperature-programmed desorption of CO2 (CO2-TPD) was performed using a chemisorber (Autochem II 2920, Micromeritics). The catalyst was pretreated at 350 °C for 1 hour in pure helium gas (50 mL/min), then cooled to 50 °C, and chemically adsorbed on CO2 at 50 °C for 30 min to reach the adsorption equilibrium. Finally, the sample was heated from 50 °C to 700 °C at a rate of 10 °C/min for CO2 desorption.

In-situ diffuse reflectance infrared Fourier transform spectroscopy (DRIFTS) was recorded using an FTIR spectrometer (Nicolet iS50, ThermoFisher Scientific) equipped with MCT/A detector and cooled by liquid nitrogen. Samples were pretreated in flowing N2 at 300 °C for 30 min before each experiment. Then background spectrum was recorded in N2 flow and would be automatically subtracted from the corresponding spectra. All spectra were measured by accumulating 64 scans with a resolution of 4 cm−1.

**Catalytic performance**











**Fig S1.** CH3OH conversion, CO2 selectivity, CO selectivity, HCHO selectivity of (a) Co0.1Cu/ZSM-5, (b) Co0.3Cu/ZSM-5, (c) Co0.7Cu/ZSM-5 catalysts

**TEM and EDS**

**
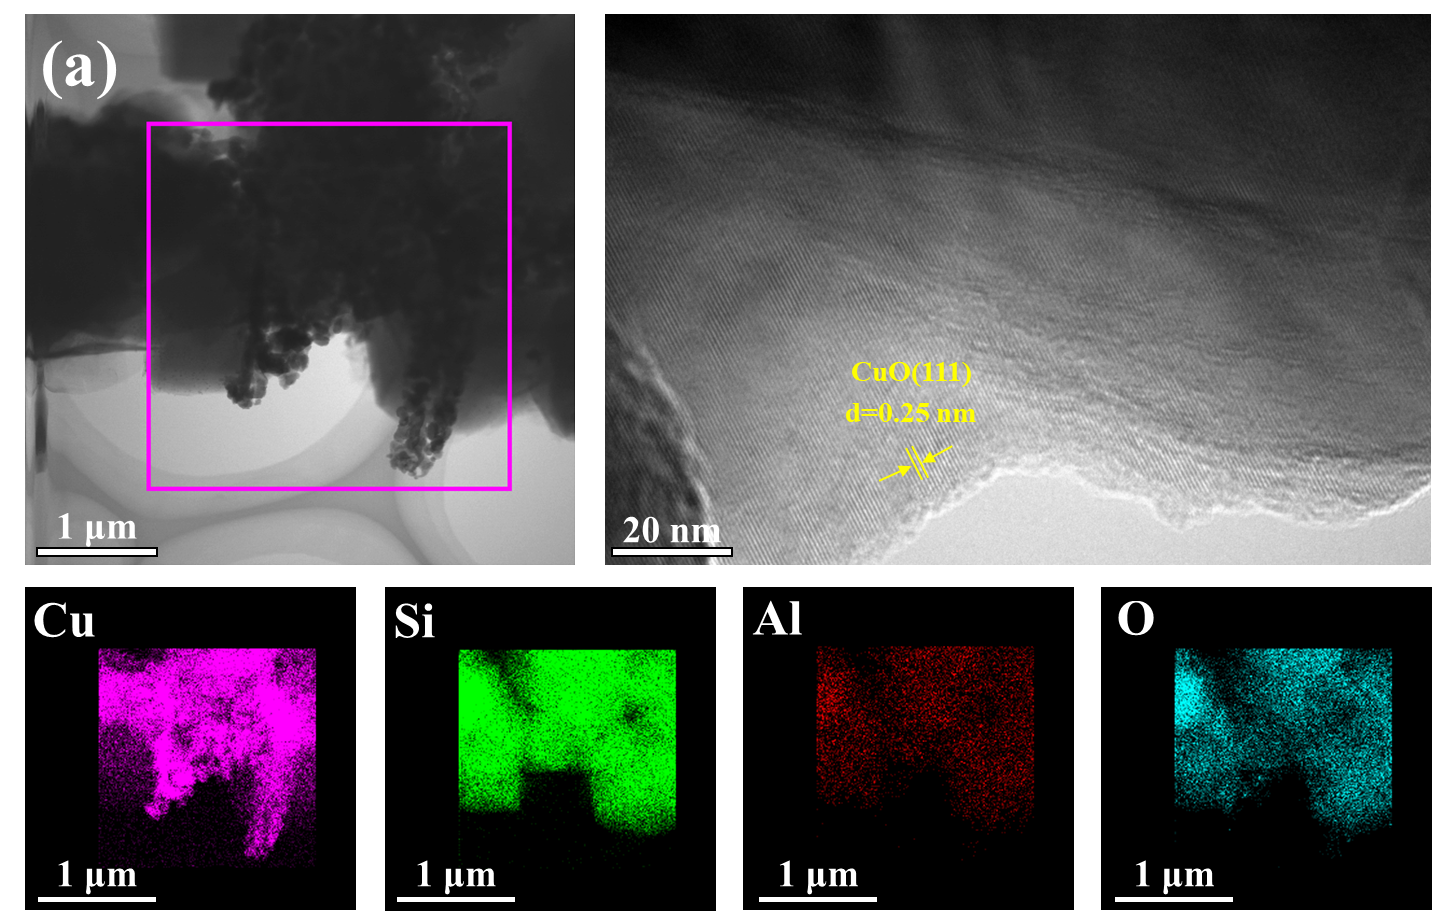
**

**
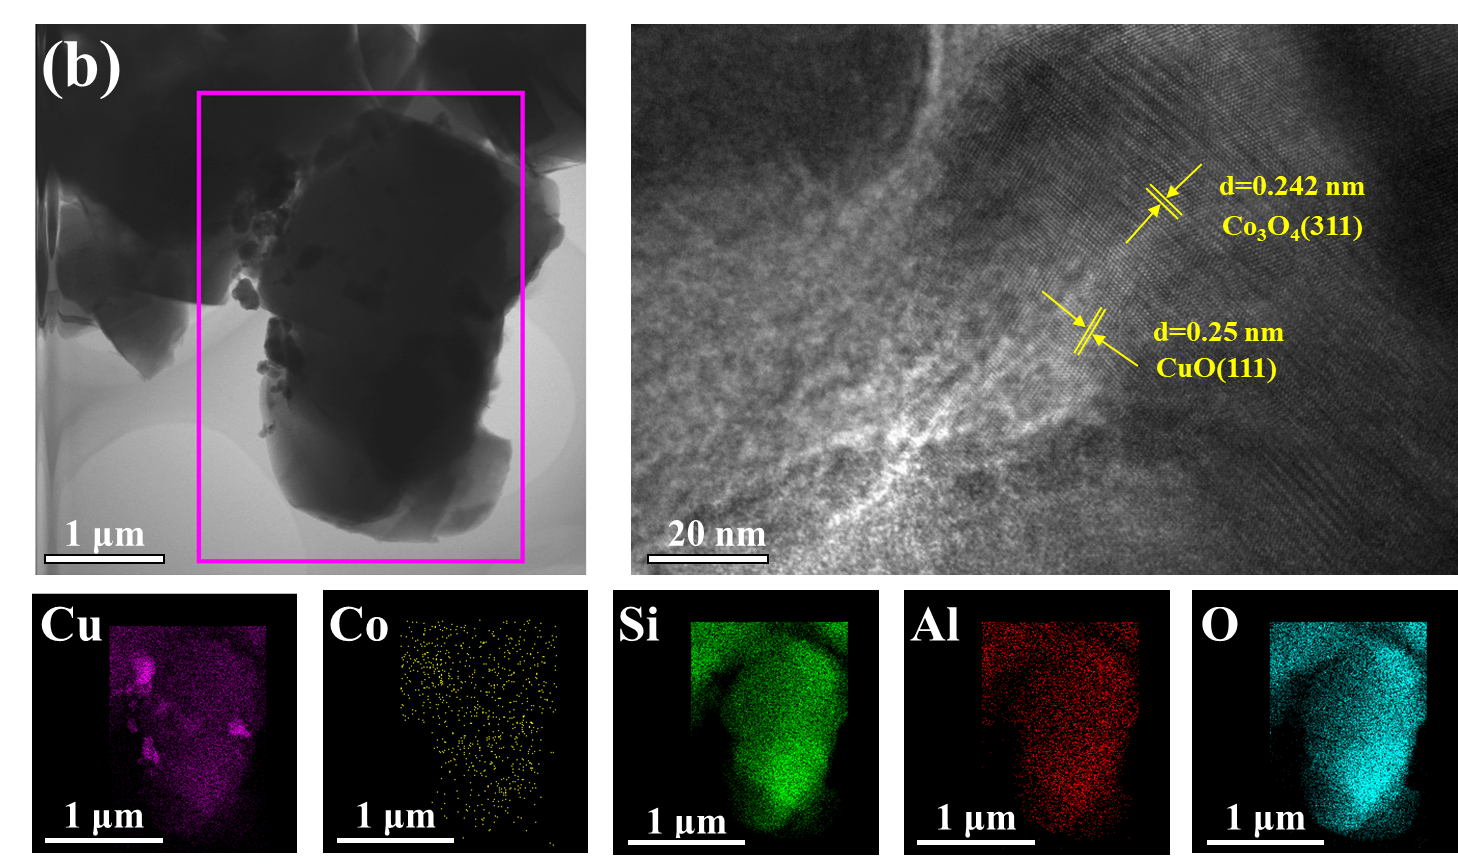
**

**
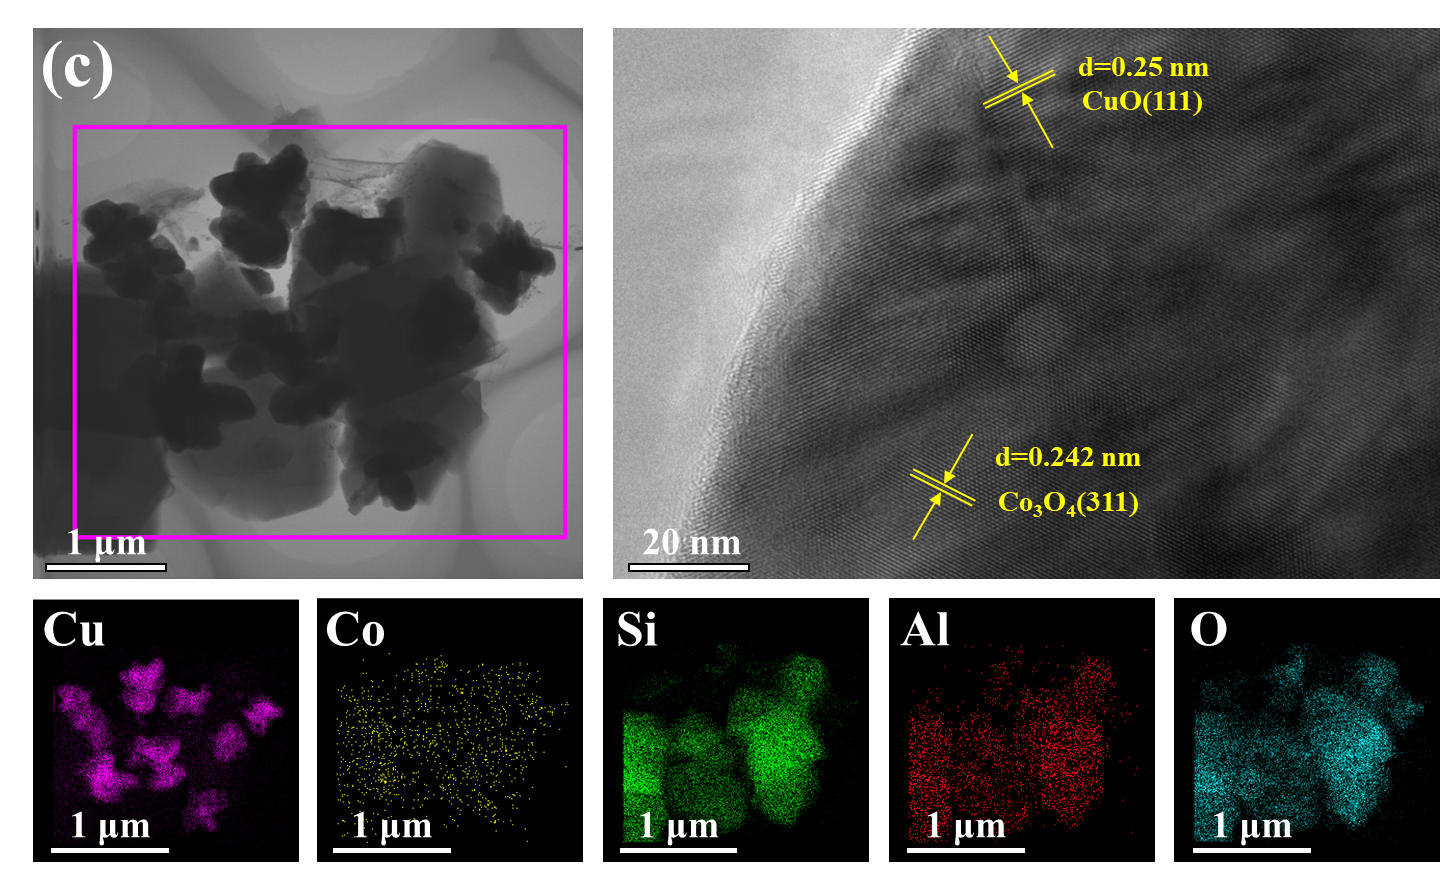
**

**
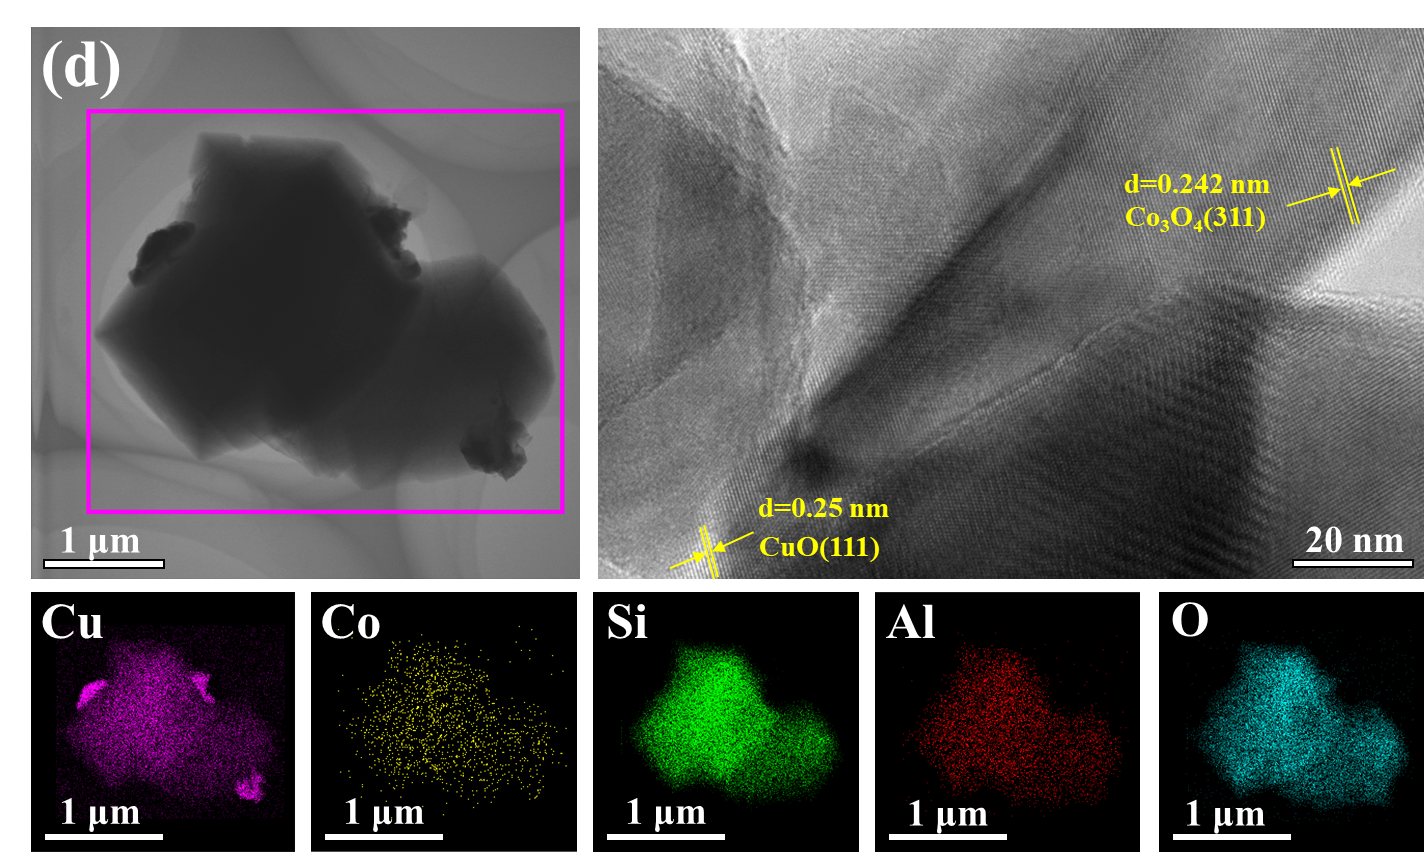
**

**Fig S2.** TEM and EDS mappings of (a) Cu/ZSM-5, (b) Co0.1Cu/ZSM-5, (c) Co0.3Cu/ZSM-5, (d) Co0.7Cu/ZSM-5 catalysts

**H2 consumption**

Table S1H2 consumption date of the Co*x*Cu/ZSM-5 catalysts

| Catalysts | H2 consumption(mmol/g) |
| --- | --- |
|
| Cu/ZSM-5 | 22.4 |
| Co0.1Cu/ZSM-5 | 17.76 |
| Co0.3Cu/ZSM-5 | 20.62 |
| Co0.5Cu/ZSM-5 | 27.2 |
| Co0.7Cu/ZSM-5 | 24.12 |

**O2-TPD**

Table S2O2-TPD date of the Co*x*Cu/ZSM-5 catalysts

| Catalysts | O2 amount (mmol/g) | | | Total amount  (mmol/g) |
| --- | --- | --- | --- | --- |
| Oα | Oβ | Oγ |
| Cu/ZSM-5 | 0.13 | 0.73 | 0.73 | 1.59 |
| Co0.1Cu/ZSM-5 | 0.10 | 1.05 | 0.76 | 1.91 |
| Co0.3Cu/ZSM-5 | 0.16 | 1.34 | 0.87 | 2.37 |
| Co0.5Cu/ZSM-5 | 0.19 | 1.40 | 0.82 | 2.41 |
| Co0.7Cu/ZSM-5 | 0.15 | 1.22 | 0.85 | 2.22 |

**CO2-TPD**

Table S3CO2-TPD date of the Co*x*Cu/ZSM-5 catalysts

| Catalysts | CO2 amount (mmol/g) | | | Total amount  (mmol/g) |
| --- | --- | --- | --- | --- |
| weak basic sites | medium basic sites | strong basic sites |
| Cu/ZSM-5 | 0.60 | 0.38 | 0.26 | 1.24 |
| Co0.1Cu/ZSM-5 | 0.34 | 0.32 | 0.13 | 0.79 |
| Co0.3Cu/ZSM-5 | 0.38 | 0.23 | 0.29 | 0.90 |
| Co0.5Cu/ZSM-5 | 0.60 | 0.30 | 0.29 | 1.19 |
| Co0.7Cu/ZSM-5 | 0.47 | 0.29 | 0.26 | 1.02 |

Table. S4The temperature of CH3OH conversion reached 90% (T90) and the temperature of CO2 selectivity reached 100% (S100) of methanol oxidation over various catalysts

| **Catalysts** | **T90 (°C)** | **S100(°C)** | **Reference** |
| --- | --- | --- | --- |
| Co0.5Cu/ZSM-5 | 160 | 180 | This work |
| Cu/ZSM-5 | 189 | 240 | [1] |
| 20CuCoO*x*@Y-A | 270 | - | [2] |
| Pd/Al2O3 | 200 | - | [3] |
| CeO2-NS | 312 | - | [4] |
| 1 % Pd/NaY | 205 | - | [5] |
| 1 % Pd/HY | 192 | - | [5] |
| Cu/Li2O/Al2O3 | - | - | [6] |
| TiO2-CeO2-CuO | 210 | 265 | [7] |

**References**

[1]. Yin S, Han Z, Jing J, Zhang S, Sheng S, Lin L, Liu T, Gao C, Tian Y (2025) ChemistrySelect 10.

[2]. Zhang X, Liu D, Zhang M, Sun L, Toyao T, He C, Chen D, Liu W, Matsuoka M, Sun H, Wang X, Chen H (2024) Chemical Engineering Journal 487.

[3]. Zhang x, Chen X, Liu Y, Guo M (2020) Water, Air, & Soil Pollution 231.

[4]. Ru X, Li W, Wang X, Shi Z, Wen X, Mo S, zhang Q, Mo D (2023) Chemical Engineering Science 281.

[5]. Zhao W, Zhang H, Zhang L, Gong J, Chen T, Ren L, Ji Y, Meng F (2022) Catalysis Letters 153:1786-1796.

[6]. Shi Z, Li W, Wen X, Wang X, Ren E, Mo D (2022) Catalysis Letters 153:2482-2492.

[7]. Matejova L, Troppova I, Pitkaaho S, Pacultova K, Fridrichova D, Kania O, Keiski R (2023) Nanomaterials (Basel) 13.
